# Supplementary material for: Valorization of pomegranate waste through green solvent extraction and biochar production: a zero-waste biorefinery approach
Source: Royal Society of Chemistry journal article supplement (doi:10.1039/d4gc03707c), 2024-01-01
Supplement: d4gc03707c1.pdf [file d4gc03707c1.pdf]

## Supporting Information

### Valorization of Pomegranate Waste through Green Solvent Extraction and Biochar Production: A Zero-Waste Biorefinery Approach

Leonardo M. **de Souza Mesquita**,<sup>a\*</sup> Letícia S. **Contieri**,<sup>a,b</sup> Bárbara M. C. **Vaz**,<sup>b</sup> Vitor **Sencadas**,<sup>c</sup> Filipe H. B. **Sosa**,<sup>b</sup> João A. P. **Coutinho**,<sup>b</sup> Maurício A. **Rostagno**,<sup>a</sup> Sónia P. M. **Ventura**<sup>b</sup>

<sup>a</sup> Multidisciplinary Laboratory of Food and Health (LabMAS), School of Applied Sciences (FCA), University of Campinas, Rua Pedro Zaccaria 1300, 13484-350, Limeira, Sao Paulo, Brazil.

<sup>b</sup> Department of Chemistry, CICECO – Aveiro Institute of Materials, University of Aveiro Campus Universitário de Santiago, 3810-193 Aveiro, Portugal.

<sup>c</sup> Department of Materials Science and Ceramic Engineering, CICECO – Aveiro Institute of Materials, University of Aveiro Campus Universitário de Santiago, 3810-193 Aveiro, Portugal.

**Corresponding author:** mesquitams@gmail.com (L.M. de Souza Mesquita) – ORCID: <https://orcid.org/0000-0002-7602-7731>; spventura@ua.pt (S. P. M. Ventura) – ORCID: <https://orcid.org/0000-0001-9049-4267>

## TABLES

**Table S1.** List of HBAs used in the COSMO-RS screening.

| Code | HBA                         | Code | HBA                                                        |
|------|-----------------------------|------|------------------------------------------------------------|
| 1    | Urea                        | 38   | Guanidine hydrochloride                                    |
| 2    | Lactic acid                 | 39   | Cholinium dihydrogen citrate                               |
| 3    | Malic acid                  | 40   | Cholinium dihydrogen phosphate                             |
| 4    | Citric acid                 | 41   | Benzyl (2-hydroxyethyl) dimethylammonium chloride          |
| 5    | Octanoic acid               | 42   | D-Glucose                                                  |
| 6    | Nonanoic acid               | 43   | L-Glucose                                                  |
| 7    | Decanoic acid               | 44   | Fructose                                                   |
| 8    | Dodecanoic acid             | 45   | Sucrose                                                    |
| 9    | Oxalic acid                 | 46   | Maltose                                                    |
| 10   | Acetamide                   | 47   | Xylose                                                     |
| 11   | Nicotinamide                | 48   | Sodium acetate                                             |
| 12   | Threonine                   | 49   | Ammonium acetate                                           |
| 13   | Ornithine                   | 50   | Sodium propionate                                          |
| 14   | Citrulline                  | 51   | Trimethylglycin                                            |
| 15   | Glycine                     | 52   | Betaine                                                    |
| 16   | Proline                     | 53   | Thereonine                                                 |
| 17   | Serine                      | 54   | Tetrapropylammonium chloride                               |
| 18   | Alanine                     | 55   | Tetrabutylammonium chloride                                |
| 19   | Histidine                   | 56   | Tetraheptylammonium chloride                               |
| 20   | Lysine                      | 57   | Tetraoctylammonium chloride                                |
| 21   | Arginine                    | 58   | Methyltrioctyl ammonium chloride                           |
| 22   | Glycerol                    | 59   | Triethylmethylammonium chloride                            |
| 23   | 1-propanol                  | 60   | Benzyltriethylammonium chloride                            |
| 24   | Ethylene glycol             | 61   | Benzyltrimethylammonium chloride                           |
| 25   | Phenol                      | 62   | Phenyltrimethylammonium chloride                           |
| 26   | o-cresol                    | 63   | N-ethyl-2-hydroxy-N,N-dimethylethanaminium chloride        |
| 27   | Cholinium acetate           | 64   | 2-(chlorocarbonyloxy)-N,N,N-trimethylethanaminium chloride |
| 28   | Cholinium chloride          | 65   | Methyltrioctylammonium bromide                             |
| 29   | Cholinium bitartrate        | 66   | Alyltriphenylphosphonium bromide                           |
| 30   | Acetylcholinium chloride    | 67   | Ethylammonium chloride                                     |
| 31   | Carnitine hydrochloride     | 68   | N,N-Diethylethanolammonium chloride                        |
| 32   | Tetraethylammonium chloride | 69   | Tetraethylammonium chloride                                |
| 33   | Tetramethylammonium bromide | 70   | Tetramethylammonium bromide                                |
| 34   | Tetrapropylammonium bromide | 71   | Methyltriphenylphosphonium bromide                         |
| 35   | Tetrabutylammonium bromide  | 72   | Menthol                                                    |

|    |                                     |    |        |
|----|-------------------------------------|----|--------|
| 36 | Methyltriphenyl phosphonium bromide | 73 | Thymol |
| 37 | Benzyltriphenylphosphonium bromide  |    |        |

**Table S2.** List of HBDs used in the COSMO-RS screening.

| Code | HBD                    | Code | HBD                     |
|------|------------------------|------|-------------------------|
| 1    | Urea                   | 73   | Benzoic acid            |
| 2    | Dimethylurea           | 74   | Salicylic acid          |
| 3    | N-methylurea           | 75   | Acetylsalicylic Acid    |
| 4    | N,N-Dimethylformamide  | 76   | Phenylacetic acid       |
| 5    | Acetamide              | 77   | p-Coumaric acid         |
| 6    | Thiourea               | 78   | Gallic Acid             |
| 7    | 1-Hexanol              | 79   | p-Hydroxy benzoic acid  |
| 8    | 1-Octanol              | 80   | Nicotinic acid          |
| 9    | 1-Decanol              | 81   | p-Toluenesulfonic acid  |
| 10   | 1-Dodecanol            | 82   | Phenylpropionic acid    |
| 11   | 1-Tetradecanol         | 83   | Itaconic acid           |
| 12   | 1-Hexadecanol          | 84   | 3-Phenyl-propionic acid |
| 13   | Cyclohexanol           | 85   | 4-Phenyl-butyric acid   |
| 14   | Glycerol               | 86   | 5-Phenyl-valeric acid   |
| 15   | Ethylene glycol        | 87   | Butyric acid            |
| 16   | 1,2-Propanediol        | 88   | Valeric acid            |
| 17   | 1,3-Butanediol         | 89   | Phenylacetic acid       |
| 18   | 2,3-Butanediol         | 90   | Glutaric acid           |
| 19   | 1,5-Pentaneiol         | 91   | Leucine                 |
| 20   | 1,6_Hexanediol         | 92   | Vanillic acid           |
| 21   | 1,7-Heptanediol        | 93   | Geranic acid            |
| 22   | 1,8-Octanediol         | 94   | Pyruvic acid            |
| 23   | 1,9-Nonanediol         | 95   | Octanoicacid            |
| 24   | 1,10-Decanediol        | 96   | Nonanoic acid           |
| 25   | 1,15-Pentadecanediol   | 97   | Decanoic acid           |
| 26   | 1,4-Butanediol         | 98   | Dodecanoic acid         |
| 27   | Diethylene glycol      | 99   | Caproic acid            |
| 28   | Triethylene glycol     | 100  | Glutamic acid           |
| 29   | Furfuryl alcohol       | 101  | Hexanoic acid           |
| 30   | 2,4,6-Trimethyl phenol | 102  | Ricinoleic acid         |
| 31   | 2-Methyl-phenol        | 103  | Hexadecanoic acid       |
| 32   | 3,4-Dimethyl-phenol    | 104  | Tetradecanoic acid      |
| 33   | 4-Chloro phenol        | 105  | Oleic acid              |
| 34   | 4-Methoxy phenol       | 106  | Lauric acid             |
| 35   | Erythritol             | 107  | Alanine                 |
| 36   | Inositol               | 108  | Arginine                |
| 37   | Mannitol               | 109  | Glycine                 |
| 38   | Sorbitol               | 110  | Histidine               |

|    |                |     |                         |
|----|----------------|-----|-------------------------|
| 39 | Xylitol        | 111 | Lysine                  |
| 40 | Arabinose      | 112 | Proline                 |
| 41 | Fructose       | 113 | Serine                  |
| 42 | Galactose      | 114 | Threonine               |
| 43 | S-Glucose      | 115 | Gulonolactone           |
| 44 | L-Glucose      | 116 | Fucose                  |
| 45 | Isosorbide     | 117 | Menthol                 |
| 46 | Maltose        | 118 | Thymol                  |
| 47 | Mannose        | 119 | $\alpha$ -Naftol        |
| 48 | Raffinose      | 120 | Resorcinol              |
| 49 | Rhamnose       | 121 | Phenol                  |
| 50 | Sorbose        | 122 | p-Chlorophenol          |
| 51 | Sucrose        | 123 | Guaiacol                |
| 52 | Trehalose      | 124 | p-Hydroxybenzyl alcohol |
| 53 | Xylose         | 125 | p-Hydroxy benzaldehyde  |
| 54 | D-Ribose       | 126 | Vanillin                |
| 55 | Formic acid    | 127 | o-Cresol                |
| 56 | Acetic acid    | 128 | Ethanolamine            |
| 57 | Aconitic acid  | 129 | Camphor                 |
| 58 | Ascorbic acid  | 130 | Pyridine                |
| 59 | Citric acid    | 131 | Quinoline               |
| 60 | Fumaric acid   | 132 | Trioctylphosphine oxide |
| 61 | Glycolic acid  | 133 | Benzamide               |
| 62 | Lactic acid    | 134 | Catechol                |
| 63 | Levulinic acid | 135 | Hydroquinone            |
| 64 | Maleic acid    | 136 | Paracetamol             |
| 65 | Malic acid     | 137 | Pyrrrole                |
| 66 | Malonic acid   | 138 | Aspirin                 |
| 67 | Oxalic acid    | 139 | 2-Methylimidazole       |
| 68 | Propionic acid | 140 | Chimaphilin             |
| 69 | Succinic acid  | 141 | Dihydroquercetin        |
| 70 | Tartaric acid  | 142 | Quercetin               |
| 71 | Mandelic acid  | 143 | Zinc Chloride           |
| 72 | Aspartic acid  | 144 | Ferric chloride         |

**Table S3.** Experimental and encoded values for extraction of anthocyanins from pomegranate waste extracted with gamma-valerolactone (GVL) in the CCRD (2<sup>4</sup>) assays.

| CCRD             | Assay | Solid-liquid ratio ( $\text{g}_{\text{biomass}} \cdot \text{mL}_{\text{solvent}}^{-1}$ ) | Concentration (M) | pH     | Time of extraction (min) | Yield of anthocyanins ( $\text{mg}_{\text{anthocyanin}} \cdot \text{g}_{\text{biomass}}^{-1}$ ) |
|------------------|-------|------------------------------------------------------------------------------------------|-------------------|--------|--------------------------|-------------------------------------------------------------------------------------------------|
|                  |       | $X_1$                                                                                    | $X_2$             | $X_3$  | $X_4$                    | $Y$                                                                                             |
| Factorial points | 1     | 0.045 (-1)                                                                               | 1.1 (-1)          | 3 (-1) | 30 (-1)                  | 23.00                                                                                           |
|                  | 2     | 0.095 (1)                                                                                | 1.1 (-1)          | 3 (-1) | 30 (-1)                  | 19.41                                                                                           |
|                  | 3     | 0.045 (-1)                                                                               | 2.9 (1)           | 3 (-1) | 30 (-1)                  | 23.53                                                                                           |
|                  | 4     | 0.095 (1)                                                                                | 2.9 (1)           | 3 (-1) | 30 (-1)                  | 20.66                                                                                           |
|                  | 5     | 0.045 (-1)                                                                               | 1.1 (-1)          | 5 (1)  | 30 (-1)                  | 19.03                                                                                           |
|                  | 6     | 0.095 (1)                                                                                | 1.1 (-1)          | 5 (1)  | 30 (-1)                  | 10.64                                                                                           |
|                  | 7     | 0.045 (-1)                                                                               | 2.9 (1)           | 5 (1)  | 30 (-1)                  | 13.22                                                                                           |
|                  | 8     | 0.095 (1)                                                                                | 2.9 (1)           | 5 (1)  | 30 (-1)                  | 17.66                                                                                           |
|                  | 9     | 0.045 (-1)                                                                               | 1.1 (-1)          | 3 (-1) | 70 (1)                   | 10.57                                                                                           |
|                  | 10    | 0.095 (1)                                                                                | 1.1 (-1)          | 3 (-1) | 70 (1)                   | 12.15                                                                                           |
|                  | 11    | 0.045 (-1)                                                                               | 2.9 (1)           | 3 (-1) | 70 (1)                   | 35.69                                                                                           |
|                  | 12    | 0.095 (1)                                                                                | 2.9 (1)           | 3 (-1) | 70 (1)                   | 21.04                                                                                           |
|                  | 13    | 0.045 (-1)                                                                               | 1.1 (-1)          | 5 (1)  | 70 (1)                   | 11.90                                                                                           |
|                  | 14    | 0.095 (1)                                                                                | 1.1 (-1)          | 5 (1)  | 70 (1)                   | 13.02                                                                                           |
|                  | 15    | 0.045 (-1)                                                                               | 2.9 (1)           | 5 (1)  | 70 (1)                   | 34.37                                                                                           |

|                |    |            |          |        |        |       |
|----------------|----|------------|----------|--------|--------|-------|
|                | 16 | 0.095 (1)  | 2.9 (1)  | 5 (1)  | 70 (1) | 21.16 |
| Axial points   | 17 | 0.020 (-2) | 2.0 (0)  | 4 (0)  | 55 (0) | 9.52  |
|                | 18 | 0.120 (2)  | 2.0 (0)  | 4 (0)  | 55 (0) | 2.38  |
|                | 19 | 0.070 (0)  | 0.2 (-2) | 4 (0)  | 55 (0) | 16.14 |
|                | 20 | 0.070 (0)  | 3.8 (2)  | 4 (0)  | 55 (0) | 19.37 |
|                | 21 | 0.070 (0)  | 2.0 (0)  | 2 (-2) | 55 (0) | 33.82 |
|                | 22 | 0.070 (0)  | 2.0 (0)  | 6 (2)  | 55 (0) | 1.53  |
|                | 23 | 0.070 (0)  | 2.0 (0)  | 4 (0)  | 5 (-2) | 21.92 |
|                | 24 | 0.070 (0)  | 2.0 (0)  | 4 (0)  | 85 (2) | 27.87 |
| Central points | 25 | 0.070 (0)  | 2.0 (0)  | 4 (0)  | 55 (0) | 24.81 |
|                | 26 | 0.070 (0)  | 2.0 (0)  | 4 (0)  | 55 (0) | 23.79 |
|                | 27 | 0.070 (0)  | 2.0 (0)  | 4 (0)  | 55 (0) | 23.45 |
|                | 28 | 0.070 (0)  | 2.0 (0)  | 4 (0)  | 55 (0) | 24.47 |

**Table S4.** Experimental and encoded values for extraction of ellagic acid derivatives from pomegranate waste extracted with choline acetate ([Ch][Act]) in the CCRD (2<sup>4</sup>) assays.

| CCRD | Assay | Solid-liquid ratio ( $\text{g}_{\text{biomass}} \cdot \text{mL}_{\text{solvent}}^{-1}$ ) | Concentration (M) | pH    | Time of extraction (min) | Yield of anthocyanins ( $\text{mg}_{\text{anthocyanin}} \cdot \text{g}_{\text{biomass}}^{-1}$ ) |
|------|-------|------------------------------------------------------------------------------------------|-------------------|-------|--------------------------|-------------------------------------------------------------------------------------------------|
|      |       | $X_1$                                                                                    | $X_2$             | $X_3$ | $X_4$                    | $Y$                                                                                             |

|                      |           |            |          |        |         |       |
|----------------------|-----------|------------|----------|--------|---------|-------|
| <b>Linear points</b> | <b>1</b>  | 0.045 (-1) | 1.1 (-1) | 4 (-1) | 30 (-1) | 5.56  |
|                      | <b>2</b>  | 0.095 (1)  | 1.1 (-1) | 4 (-1) | 30 (-1) | 5.88  |
|                      | <b>3</b>  | 0.045 (-1) | 2.9 (1)  | 4 (-1) | 30 (-1) | 13.30 |
|                      | <b>4</b>  | 0.095 (1)  | 2.9 (1)  | 4 (-1) | 30 (-1) | 12.51 |
|                      | <b>5</b>  | 0.045 (-1) | 1.1 (-1) | 10 (1) | 30 (-1) | 14.96 |
|                      | <b>6</b>  | 0.095 (1)  | 1.1 (-1) | 10 (1) | 30 (-1) | 13.73 |
|                      | <b>7</b>  | 0.045 (-1) | 2.9 (1)  | 10 (1) | 30 (-1) | 14.19 |
|                      | <b>8</b>  | 0.095 (1)  | 2.9 (1)  | 10 (1) | 30 (-1) | 20.82 |
|                      | <b>9</b>  | 0.045 (-1) | 1.1 (-1) | 4 (-1) | 70 (1)  | 4.41  |
|                      | <b>10</b> | 0.095 (1)  | 1.1 (-1) | 4 (-1) | 70 (1)  | 5.51  |
|                      | <b>11</b> | 0.045 (-1) | 2.9 (1)  | 4 (-1) | 70 (1)  | 12.62 |
|                      | <b>12</b> | 0.095 (1)  | 2.9 (1)  | 4 (-1) | 70 (1)  | 19.60 |
|                      | <b>13</b> | 0.045 (-1) | 1.1 (-1) | 10 (1) | 70 (1)  | 13.12 |
|                      | <b>14</b> | 0.095 (1)  | 1.1 (-1) | 10 (1) | 70 (1)  | 13.49 |
|                      | <b>15</b> | 0.045 (-1) | 2.9 (1)  | 10 (1) | 70 (1)  | 14.72 |
|                      | <b>16</b> | 0.095 (1)  | 2.9 (1)  | 10 (1) | 70 (1)  | 22.14 |
| <b>Axial points</b>  | <b>17</b> | 0.020 (-2) | 2.0 (0)  | 7 (0)  | 55 (0)  | 13.45 |
|                      | <b>18</b> | 0.120 (2)  | 2.0 (0)  | 7 (0)  | 55 (0)  | 19.93 |

|                       |           |           |          |        |        |       |
|-----------------------|-----------|-----------|----------|--------|--------|-------|
|                       | <b>19</b> | 0.070 (0) | 0.2 (-2) | 7 (0)  | 55 (0) | 10.04 |
|                       | <b>20</b> | 0.070 (0) | 3.8 (2)  | 7 (0)  | 55 (0) | 13.07 |
|                       | <b>21</b> | 0.070 (0) | 2.0 (0)  | 1 (-2) | 55 (0) | 20.69 |
|                       | <b>22</b> | 0.070 (0) | 2.0 (0)  | 13 (2) | 55 (0) | 23.78 |
|                       | <b>23</b> | 0.070 (0) | 2.0 (0)  | 7 (0)  | 5 (-2) | 18.44 |
|                       | <b>24</b> | 0.070 (0) | 2.0 (0)  | 7 (0)  | 85 (2) | 16.78 |
| <b>Central points</b> | <b>25</b> | 0.070 (0) | 2.0 (0)  | 7 (0)  | 55 (0) | 19.76 |
|                       | <b>26</b> | 0.070 (0) | 2.0 (0)  | 7 (0)  | 55 (0) | 19.85 |
|                       | <b>27</b> | 0.070 (0) | 2.0 (0)  | 7 (0)  | 55 (0) | 18.92 |
|                       | <b>28</b> | 0.070 (0) | 2.0 (0)  | 7 (0)  | 55 (0) | 20.88 |

**Table S5.** List of synthetic food and textile dyes used in the adsorption experiments using the produced pomegranate biochar material.

| <b>Dye</b> | <b>Compound</b> | <b>Structure</b> | <b>Purity</b> | <b>Molar mass (g.mol<sup>-1</sup>)</b> | <b>Source</b> |
|------------|-----------------|------------------|---------------|----------------------------------------|---------------|
|            |                 |                  |               |                                        |               |



|                     |                     |                                                                                                                                                                                                                                                                                                                                                                                                                                        |      |        |               |
|---------------------|---------------------|----------------------------------------------------------------------------------------------------------------------------------------------------------------------------------------------------------------------------------------------------------------------------------------------------------------------------------------------------------------------------------------------------------------------------------------|------|--------|---------------|
| <b>Food dyes</b>    | Sunset Yellow       | 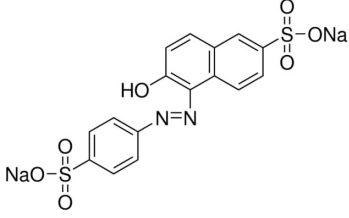 <p>The structure shows a naphthalene ring system with a hydroxyl group at position 1 and a sulfonate group at position 4. It is connected via an azo group (-N=N-) to a benzene ring with a sulfonate group at the para position.</p>                                                                                                               | 90%  | 452.37 | Sigma Aldrich |
|                     | Tartrazine yellow   |  <p>The structure features a central pyrazolone ring with a hydroxyl group at position 4 and a sodium salt group at position 5. It is connected via azo groups (-N=N-) to two benzene rings, each with a sulfonate group at the para position.</p>                                                                                                   | >85% | 534.36 | Sigma Aldrich |
|                     | Brilliant blue      |  <p>The structure is a complex triphenylmethane derivative. It consists of a central carbon atom bonded to three phenyl rings. One ring has a dimethylamino group (-N(CH<sub>3</sub>)<sub>2</sub>) and a sulfonate group. The other two rings also have sulfonate groups. Two sodium ions (Na<sup>+</sup>) are shown as counterions.</p>             | 95%  | 792.85 | Sigma Aldrich |
|                     | Allura red (red 40) |  <p>The structure shows a naphthalene ring system with a hydroxyl group at position 1, a methoxy group (-OCH<sub>3</sub>) at position 2, and a sulfonate group at position 4. It is connected via an azo group (-N=N-) to a benzene ring with a sulfonate group at the para position and a methyl group (-CH<sub>3</sub>) at the meta position.</p> | 80%  | 496.42 | Sigma Aldrich |
| <b>Textile dyes</b> | Indigo carmine blue |  <p>The structure is a bis-indole-1,3-dione derivative. It consists of two indole-1,3-dione rings connected at their 2-positions. Each ring has a sulfonate group at the 5-position. One sodium ion (Na<sup>+</sup>) is shown as a counterion.</p>                                                                                                 | 95%  | 466.35 | Sigma Aldrich |

|  |                  |                                                                                    |     |        |               |
|--|------------------|------------------------------------------------------------------------------------|-----|--------|---------------|
|  | Chloranilic acid | 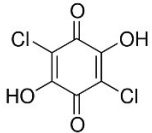  | 99% | 208.98 | Sigma Aldrich |
|  | Rhodamine B      |  | 99% | 479.01 | Merck         |

**Table S6.** Retention time (RT), molecular ion ( $[M]^+ - m/z$ ), fragmentation pattern ( $MS^2$ ), and putative identification of the anthocyanins-rich fraction, recorded at 520 nm, and ellagic acid-rich fraction and derivatives recorded at 350 nm.

| Extract                                                                    | Peak     | Time (min) | $[M]^+ (m/z)$ | $MS^2$   | Compound                               |
|----------------------------------------------------------------------------|----------|------------|---------------|----------|----------------------------------------|
| <b>Anthocyanins fraction – chromatogram recorded at 520 nm – Figure 1A</b> | <b>1</b> | 1.91       | 627           | 465,303  | delphinidin-3,5- <i>O</i> -diglucoside |
|                                                                            | <b>2</b> | 2.07       | 595           | 449, 287 | cyanidin-3- <i>O</i> -rutinoside       |
|                                                                            | <b>3</b> | 2.25       | 433           | 271      | pelargonidin-3- <i>O</i> -glucoside    |
|                                                                            | <b>4</b> | 2.50       | 465           | 303      | delphinidin-3- <i>O</i> -glucoside     |
|                                                                            | <b>5</b> | 2.85       | 449           | 287      | cyanidin 3- <i>O</i> -glucoside        |

|                                                                            |          |      |      |               |                       |
|----------------------------------------------------------------------------|----------|------|------|---------------|-----------------------|
| <i>Ellagic acid fraction – chromatogram recorded at 350 nm – Figure 1B</i> | <b>1</b> | 2.53 | 1083 | 781, 601, 301 | $\alpha$ -punigalagin |
|                                                                            | <b>2</b> | 2.63 | 1083 | 781, 601, 301 | $\beta$ -punigalagin  |
|                                                                            | <b>3</b> | 3.35 | 301  | 283, 257      | ellagic acid          |

**Table S7.** Summary of the average macro-composition (ash, protein, fiber, fat, carbohydrates, and moisture) of pomegranate wastes reported in the literature.

| Ash (%)            | Protein (%)        | Fiber (%)           | Fat (%)            | Carbohydrates (%)   | Moisture (%)         | Reference        |
|--------------------|--------------------|---------------------|--------------------|---------------------|----------------------|------------------|
| 6.80               | 5.10               | 12.61               | 1.50               | 30.50               | 43.49                | <sup>1</sup>     |
| 3.71               | 3.96               | 28.10               | 0.00               | 30.65               | 33.58                | <sup>2</sup>     |
| 4.41               | 5.59               | 31.03               | 0.00               | 33.02               | 25.96                | <sup>3</sup>     |
| 4.85               | 4.18               | 18.48               | 0.80               | 26.70               | 44.99                | <sup>4</sup>     |
| 3.40               | 4.90               | 16.30               | 1.26               | 17.70               | 56.44                | <sup>5</sup>     |
| 4.22               | 3.96               | 28.10               | 0.00               | 30.65               | 33.07                | <sup>6</sup>     |
| 3.40               | 4.90               | 19.41               | 1.26               | 17.70               | 53.33                | <sup>7</sup>     |
| <b>4.40 ± 1.19</b> | <b>4.66 ± 0.63</b> | <b>22.00 ± 7.02</b> | <b>0.69 ± 0.69</b> | <b>26.70 ± 6.42</b> | <b>41.55 ± 11.21</b> | <b>Mean ± SD</b> |

**Table S8.** The activity coefficients at infinite dilution ( $\ln \gamma^\infty$ ) of delphinidin-3-*O*-glucoside and ellagic acid in bio-based solvents in aqueous solution (50 % molar fraction) at 35 °C.

| Code | Bio-based solvent        | $\ln \gamma^\infty$ - delphinidin-3- <i>O</i> -glucoside | $\ln \gamma^\infty$ - ellagic acid |
|------|--------------------------|----------------------------------------------------------|------------------------------------|
| 1    | Water                    | 0.78                                                     | -1.09                              |
| 2    | Ethanol                  | -6.02                                                    | -8.07                              |
| 3    | 1,3-Propanediol          | -6.21                                                    | -8.99                              |
| 4    | Glycerol                 | -4.60                                                    | -7.31                              |
| 5    | 1-Butanol                | -3.30                                                    | -7.00                              |
| 6    | 2-Butanol                | -3.50                                                    | -7.36                              |
| 7    | Tert-butanol             | -3.84                                                    | -7.68                              |
| 8    | 1,2-Butanediol           | -3.44                                                    | -6.50                              |
| 9    | 1,3-Butanediol           | -4.99                                                    | -8.45                              |
| 10   | 1-Octanol                | 0.51                                                     | -5.69                              |
| 11   | 2,3-Butanediol           | -4.04                                                    | -7.23                              |
| 12   | 2-Octanol                | 0.57                                                     | -5.88                              |
| 13   | Octan-4-ol               | 0.96                                                     | -5.49                              |
| 14   | Ethylacetate             | -5.65                                                    | -9.41                              |
| 15   | Cyrene                   | -4.20                                                    | -8.26                              |
| 16   | Dimethyl isosorbide      | -5.20                                                    | -9.28                              |
| 17   | $\gamma$ -valerolactone  | -7.20                                                    | -10.25                             |
| 18   | Lactic acid              | -2.47                                                    | -2.72                              |
| 19   | Limonene                 | 3.27                                                     | -3.79                              |
| 20   | Solketal                 | -5.31                                                    | -8.95                              |
| 21   | $\beta$ -Pinene          | 3.56                                                     | -3.48                              |
| 22   | $\alpha$ -Pinene         | 4.38                                                     | -2.98                              |
| 23   | Dimethyl carbonate       | -6.57                                                    | -9.72                              |
| 24   | Ethyl lactate            | -4.80                                                    | -8.25                              |
| 25   | Succinic acid            | -2.48                                                    | -1.56                              |
| 26   | Butyl levulinate         | -2.80                                                    | -8.60                              |
| 27   | Cyclopentyl methyl ether | -2.52                                                    | -8.37                              |
| 28   | Dibutyl succinate        | -1.46                                                    | -8.44                              |
| 29   | Ethyl levulinate         | -5.94                                                    | -10.26                             |
| 30   | Furfuryl alcohol         | -4.16                                                    | -6.60                              |
| 31   | $\gamma$ -Butyrolactone  | -7.85                                                    | -10.38                             |
| 32   | Levulinic acid           | -2.65                                                    | -4.74                              |
| 33   | Propyl guaiacol          | -1.18                                                    | -7.79                              |
| 34   | Propyl syringol          | 1.57                                                     | -4.29                              |
| 35   | 1,2,3-Tributoxypropane   | 3.27                                                     | -6.68                              |
| 36   | 1,3-Dibutoxy-2-propanol  | 0.23                                                     | -7.60                              |
| 37   | 1,3-Diethoxy-2-propanol  | -3.32                                                    | -9.08                              |
| 38   | 3-Butoxy-1,2-propanediol | -1.62                                                    | -6.39                              |
| 39   | 3-Ethoxy-1,2-propanediol | -3.00                                                    | -6.79                              |
| 40   | 2,5-Dimethylfuran        | -0.99                                                    | -5.60                              |
| 41   | Gluconic acid            | 0.37                                                     | -1.78                              |
| 42   | Glycerol triacetate      | -4.34                                                    | -8.25                              |
| 43   | Propylene carbonate      | 3.42                                                     | -7.95                              |
| 44   | Terpinolene              | -4.56                                                    | -3.72                              |

|    |                               |       |        |
|----|-------------------------------|-------|--------|
| 45 | 1,3-Dioxane-5-ol              | -5.98 | -7.30  |
| 46 | 4-Hydroxymethyl-1,3-dioxolane | -4.61 | -8.75  |
| 47 | Diethyl succinate             | -4.34 | -9.70  |
| 48 | Methyl isobutyl ketone        | -5.08 | -10.31 |
| 49 | Triacetin                     | -3.42 | -8.52  |

**Table S9.** Predicted results found through the mathematical model developed for the optimization of anthocyanins recovery and the respective relative deviation from the independent variables: solid-liquid ratio (SLR), concentration of gamma-valerolactone - GVL (C - M), pH, and time of extraction ( $t_{\text{ext}}$ ) to define the  $2^4$  CCRD. V1, V2, and V3 represent the validation experimental assays.

| Assays                  | SLR ( $X_1$ )<br>( $\text{g}_{\text{biomass}} \cdot \text{mL}_{\text{solvent}}^{-1}$ ) | C ( $X_2$ ) M | pH ( $X_3$ ) | $t_{\text{ext}}$ ( $X_4$ )<br>min | Predicted values<br>( $\text{mg}_{\text{anthocyanins}} \cdot \text{g}_{\text{biomass}}^{-1}$ ) | Experimental values<br>( $\text{mg}_{\text{anthocyanins}} \cdot \text{g}_{\text{biomass}}^{-1}$ ) | Relative deviation (%) |
|-------------------------|----------------------------------------------------------------------------------------|---------------|--------------|-----------------------------------|------------------------------------------------------------------------------------------------|---------------------------------------------------------------------------------------------------|------------------------|
| V1                      | 0.07                                                                                   | 2.9           | 3            | 30                                | 37.4                                                                                           | 38.5                                                                                              | 3.0                    |
| V2                      |                                                                                        |               |              |                                   |                                                                                                | 38.6                                                                                              | 3.3                    |
| V3                      |                                                                                        |               |              |                                   |                                                                                                | 38.5                                                                                              | 2.9                    |
| <b>Final Validation</b> |                                                                                        |               |              |                                   |                                                                                                | <b>38.52 ± 0.06</b>                                                                               | <b>3.06 ± 0.21</b>     |

**Table S10.** Predicted results found through the mathematical model developed for the optimization of ellagic acid and derivatives and the respective relative deviation from the independent variables: solid-liquid ratio (SLR), concentration of cholinium acetate - [Ch][Act] (C - M), pH, and time of extraction ( $t_{\text{ext}}$ ) to define the  $2^4$  CCRD. V1, V2, and V3 represent the validation experimental assays.

| Assays                  | SLR ( $X_1$ )<br>( $\text{g}_{\text{biomass}} \cdot \text{mL}_{\text{solvent}}^{-1}$ ) | C ( $X_2$ ) M | pH ( $X_3$ ) | $t_{\text{ext}}$ ( $X_4$ )<br>min | Predicted values<br>( $\text{mg}_{\text{anthocyanins}} \cdot \text{g}_{\text{biomass}}^{-1}$ ) | Experimental values<br>( $\text{mg}_{\text{anthocyanins}} \cdot \text{g}_{\text{biomass}}^{-1}$ ) | Relative deviation (%) |
|-------------------------|----------------------------------------------------------------------------------------|---------------|--------------|-----------------------------------|------------------------------------------------------------------------------------------------|---------------------------------------------------------------------------------------------------|------------------------|
| V1                      | 0.07<br>$\text{g}_{\text{biomass}} \cdot \text{mL}_{\text{solvent}}^{-1}$              | 2900<br>mM    | 13           | 55 min                            | 21.5                                                                                           | 21.4                                                                                              | -0.32                  |
| V2                      |                                                                                        |               |              |                                   |                                                                                                | 21.9                                                                                              | 2.3                    |
| V3                      |                                                                                        |               |              |                                   |                                                                                                | 22.1                                                                                              | 3.2                    |
| <b>Final Validation</b> |                                                                                        |               |              |                                   |                                                                                                | <b>21.82 ± 0.36</b>                                                                               | <b>1.73 ± 1.83</b>     |

**Table S11.** Elemental analysis of the biochar produced by the (D)ES-mediated process.

| Sample                                                         | %carbon | %oxygen | %hydrogen | %nitrogen | %sulfur |
|----------------------------------------------------------------|---------|---------|-----------|-----------|---------|
| Pomegranate biochar                                            | 43.96   | 47.90   | 5.48      | 2.66      | n.d.    |
| Pomegranate biochar after indigo blue adsorption (textile dye) | 42.87   | 48.37   | 5.26      | 2.69      | 0.81    |

|                                                               |       |       |      |      |      |
|---------------------------------------------------------------|-------|-------|------|------|------|
| Pomegranate biochar after sunset yellow adsorption (food dye) | 43.26 | 48.13 | 5.38 | 2.55 | 0.68 |
|---------------------------------------------------------------|-------|-------|------|------|------|

**Table S12.** Detailed scores of each principle from *Path2Green* metric that is rooted in the 12 principles of green extraction.

| <b>Green Extraction Principles</b>                                                                                          | <b>Attributed Weight<sup>a</sup></b> | <b>Score</b> | <b>Reason</b>                                                                                                                                                                                                                                                                                                                                                                                                                                                                                                                                                                                                                  |
|-----------------------------------------------------------------------------------------------------------------------------|--------------------------------------|--------------|--------------------------------------------------------------------------------------------------------------------------------------------------------------------------------------------------------------------------------------------------------------------------------------------------------------------------------------------------------------------------------------------------------------------------------------------------------------------------------------------------------------------------------------------------------------------------------------------------------------------------------|
| <b>Principle 1 – Biomass:</b> Select biomass that is naturally sourced or requires minimal resource usage for production.   | <b>6.00</b>                          | <b>+1.00</b> | The pomegranate used in this work is considered a waste from the juicy industry.                                                                                                                                                                                                                                                                                                                                                                                                                                                                                                                                               |
| <b>Principle 2 – Transport:</b> Preserving biomass integrity while minimizing transport's environmental impact.             | <b>5.00</b>                          | <b>-1.00</b> | The biomass used in this work, despite being industrial waste, was transported from California, USA, to the extraction site in Portugal. However, this score can be better considering the need to perform the biorefinery approach near the biomass origin site.                                                                                                                                                                                                                                                                                                                                                              |
| <b>Principle 3 – Pre-treatment:</b> Pre-treatment: Optimization for pre-treatment avoidance and cost-effective techniques.  | <b>2.50</b>                          | <b>-0.20</b> | Only physical pretreatments were used to pre-treat the used biomass.                                                                                                                                                                                                                                                                                                                                                                                                                                                                                                                                                           |
| <b>Principle 4 – Solvent:</b> Minimize solvent usage, prioritizing those of biological origin, biodegradable and non-toxic. | <b>6.00</b>                          | <b>0.00</b>  | A three-step biorefinery approach was developed to recover three valuable products from pomegranate waste: anthocyanins, an ellagic acid-rich fraction, and biochar material. This process utilized three solvents: bio-based gamma-valerolactone (scoring 0.00 in the CHEM21 database), cholinium acetate (which can be produced as a bio-based ionic liquid but is predominantly commercialized via synthetic routes, also scoring 0.00), and an eutectic solvent formulated from cholinium chloride and oxalic acid. While these solvents offer a sustainable alternative to traditional fossil-fuel-based volatile organic |

|                                                                                                                        |             |              |                                                                                                                                                                                                 |
|------------------------------------------------------------------------------------------------------------------------|-------------|--------------|-------------------------------------------------------------------------------------------------------------------------------------------------------------------------------------------------|
|                                                                                                                        |             |              | solvents, concerns about their production remain. As such, a neutral score (0.00) was applied in this metric to reflect these considerations.                                                   |
| <b>Principle 5 – Scaling:</b> Ensure reproducibility and a continuous extraction flow.                                 | <b>5.00</b> | <b>-1.00</b> | A batch biorefinery process was employed, which poses challenges for scaling up. However, the operational units performed in this process can be replaced for at least semi-continuous mode.    |
| <b>Principle 6 – Purification:</b> Final application dictates the extent of purification.                              | <b>2.50</b> | <b>+1.00</b> | Ready-to-use extracts were obtained (anthocyanins, and ellagic acid-rich fractions) without needing purification.                                                                               |
| <b>Principle 7 – Yield:</b> Maximize the utilization and valorization of the biomass.                                  | <b>4.00</b> | <b>+1.00</b> | Complete valorization of the biomass. No residual biomass obtained in the end of the process.                                                                                                   |
| <b>Principle 8 – Post-treatment:</b> Functionalization of natural products post-extraction to maximize their benefits. | <b>2.50</b> | <b>+1.00</b> | Ready-to-use extracts were obtained (anthocyanins, and ellagic acid-rich fractions) without the need to purification – without the need to perform a post-treatment strategy.                   |
| <b>Principle 9 – Energy:</b> Prioritize using clean energy sources and high-efficiency extraction techniques.          | <b>5.00</b> | <b>+0.50</b> | A low-dependent extraction technique was performed using renewable energy.                                                                                                                      |
| <b>Principle 10 – Application:</b> Ensure safety for applications in several domains.                                  | <b>4.5</b>  | <b>+1.00</b> | The obtained anthocyanins, ellagic acid and its derivatives can be applied in several sectors, which include pharma, nutraceutical, cosmetic, nutritional, food, biomedical, consumer products. |
| <b>Principle 11 – Repurposing:</b> Trace strategies to perform closed-loop extraction systems, preferably              | <b>6.00</b> | <b>+1.00</b> | Non-virgin raw materials were employed.                                                                                                                                                         |



|                                                                                                       |             |              |                                                                                                     |
|-------------------------------------------------------------------------------------------------------|-------------|--------------|-----------------------------------------------------------------------------------------------------|
| using non-virgin materials.                                                                           |             |              |                                                                                                     |
| <b>Principle 12 – Waste management:</b> Refine waste reduction and ensure effective waste management. | <b>6.00</b> | <b>+1.00</b> | A zero waste biorefinery approach was developed culminating in the biochar production (zero waste). |

*\*Weight selected according to preconized in Path2Green original article.*

## Figures

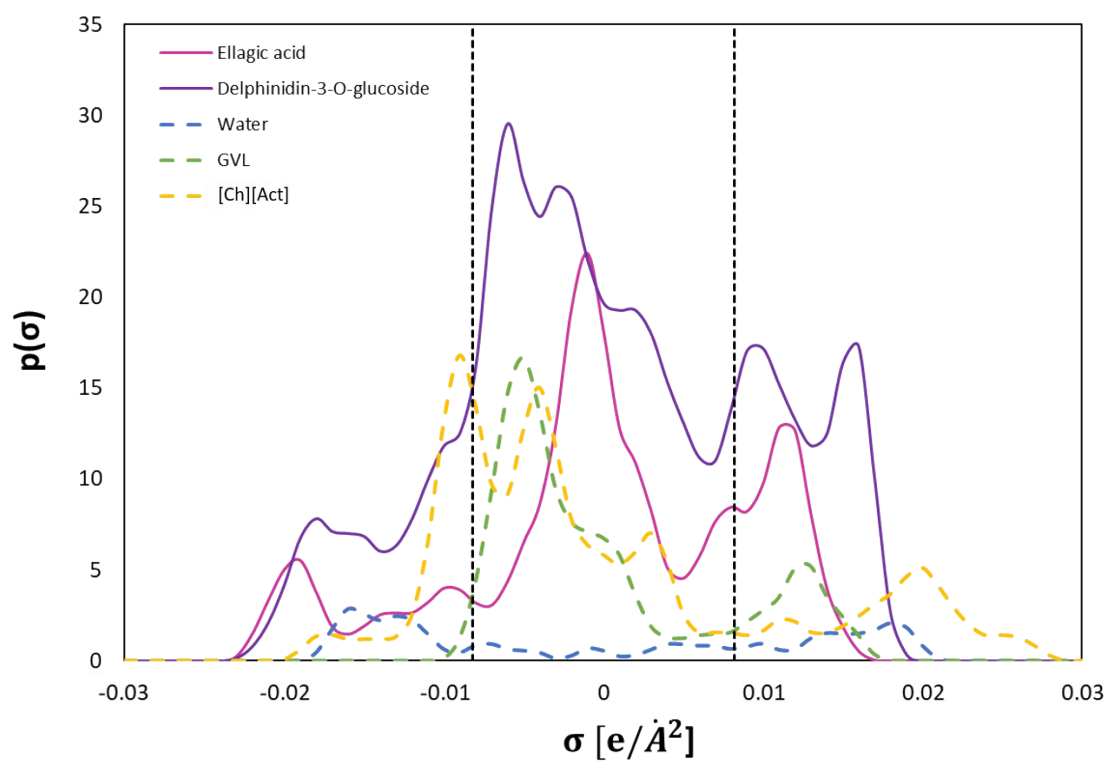

**Figure S1.** The  $\sigma$ -profiles and  $\sigma$ -potential -  $\mu(\sigma)$  – from COSMO-RS of delphinidin-3-O-glucoside (—), ellagic acid (—), GVL (---), water (---) and [Ch][Act] (---) at 35 °C.

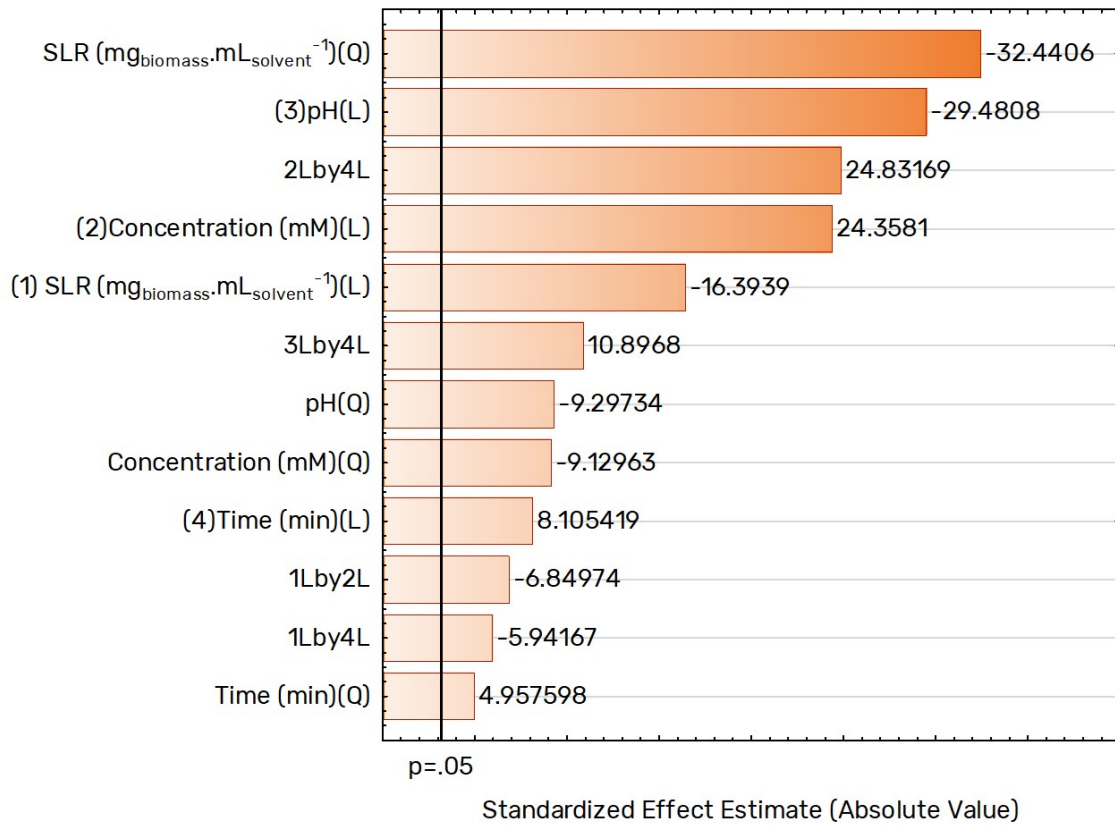

**Figure S2.** Pareto chart of the CCRD ( $2^4$  + axial points) regarding the anthocyanins extraction yield from pomegranate wastes using gamma-valerolactone (GVL) as solvent. The point at which the estimated effects are statistically significant ( $p < 0.05$ ) is indicated by the continuous vertical line

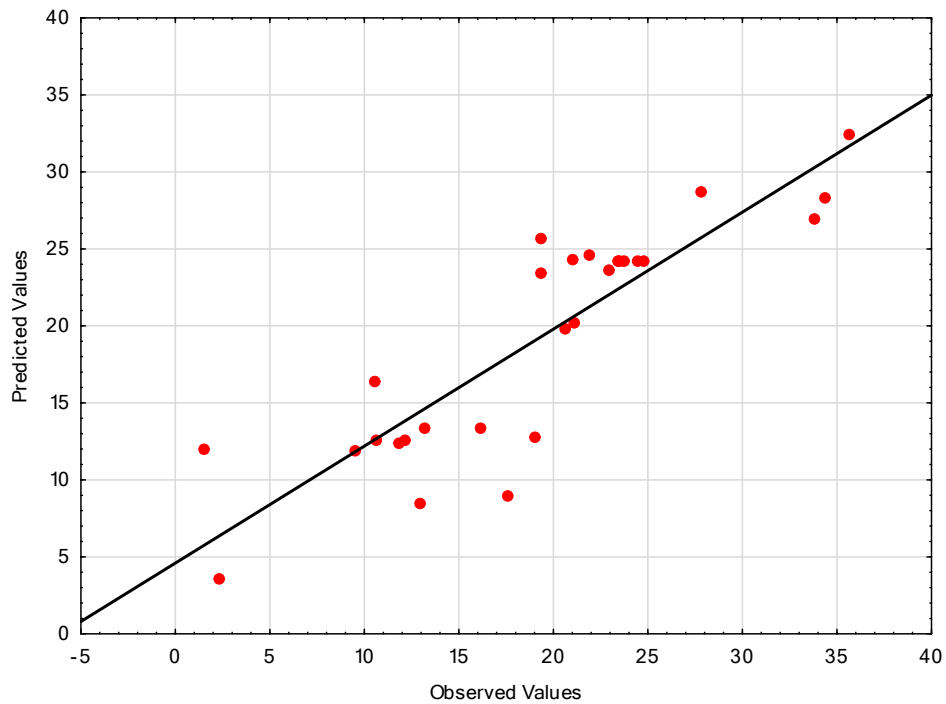

**Figure S3.** Predicted vs. Experimental values of the CCRD ( $2^4$  + axial points) regarding the anthocyanins extraction yield from pomegranate wastes using gamma-valerolactone (GVL) as solvent.

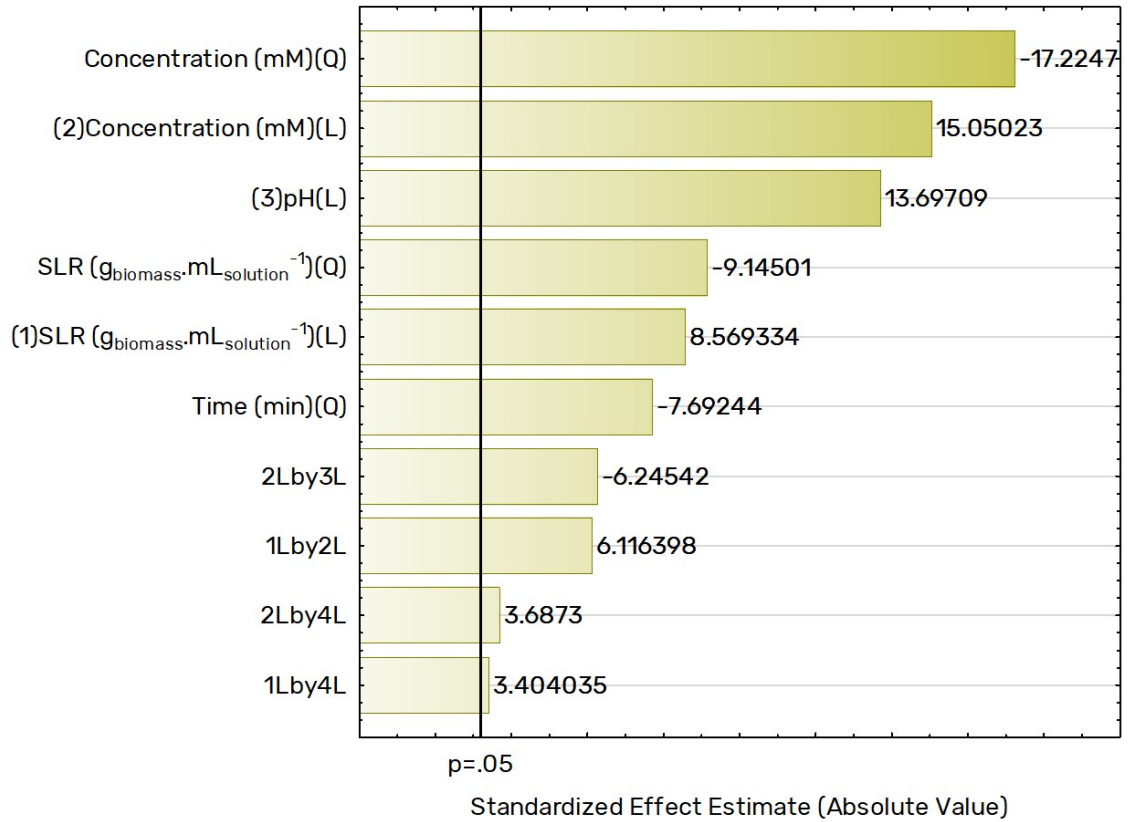

**Figure S4.** Pareto chart of the CCRD ( $2^4$  + axial points) regarding the extraction yield of ellagic acid and derivatives from pomegranate using cholinium acetate [Ch][Act] as solvent. The point at which the estimated effects are statistically significant ( $p < 0.05$ ) is indicated by the continuous vertical line.

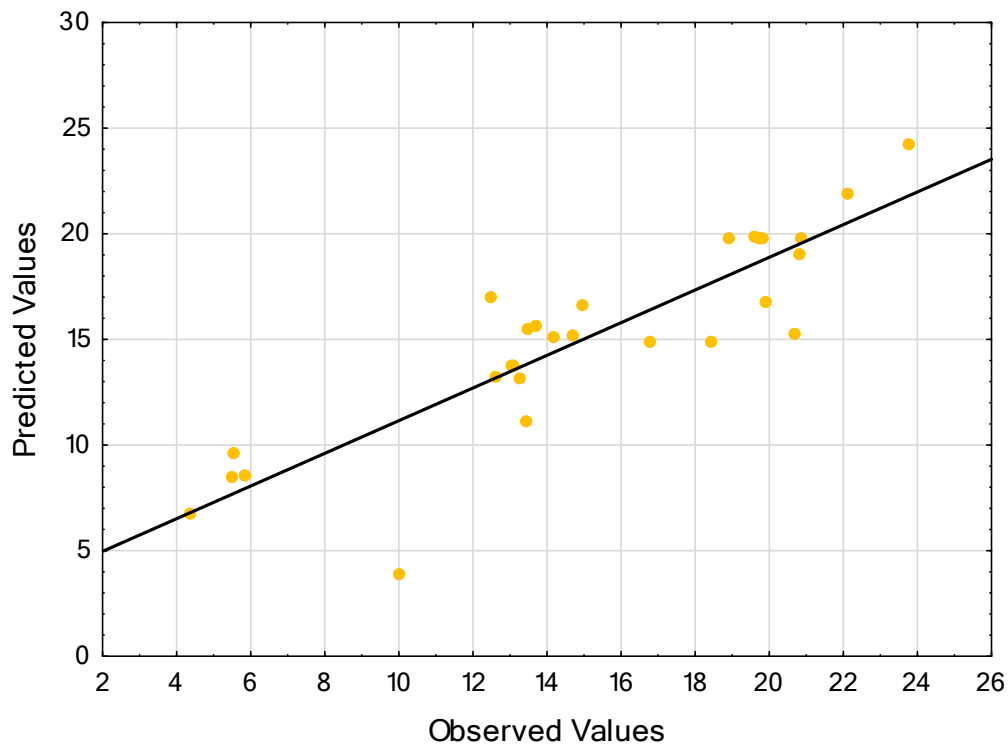

**Figure S5.** Predicted vs. Experimental values of the CCRD (2<sup>4</sup> + axial points) regarding the ellagic acid-rich fraction extraction yield from pomegranate wastes using cholinium acetate [Ch][Act] as solvent.

## SECTION 1 – KINETIC MODELS AND BIOCHAR APPLICATION

- Non-linear forms of the pseudo first order and pseudo second order kinetic equations:

$$\log(Q_e - Q_t) = \log Q_e - \left(\frac{k_1}{2.303}\right)t$$

- Non-linear forms of the pseudo-second order kinetic equation:

$$Q_t - \left(\frac{k_2 Q_e^2 t}{1 + k_2 Q_e t}\right)t$$

Where  $Q_t$  is the amount of dye adsorbed at time “t”,  $Q_e$  is the amount of dye adsorbed at equilibrium, t is the time in minutes,  $k_1$  is the rate constant of the first order model ( $\text{min}^{-1}$ ) and  $k_2$  is the rate constant of the second order model ( $\text{g}\cdot\text{mg}^{-1}\cdot\text{min}^{-1}$ ).

As a proof of concept, adsorption experiments of synthetic food and textile dyes in the biochar material were proposed. Initially, the absorption of the food dye sunset yellow was tested, with the kinetic adsorption model being presented in Figure S6. After 75 min of contact between the biochar and the aqueous solution of sunset yellow (E 110), at circa 99.2% ( $0.023 \text{ mg}_{\text{dye}}\cdot\text{mL}_{\text{solution}}^{-1}$ ) of the dye is remediated (adsorbed in the biochar). Afterward, the same condition was tested to investigate if the biochar material could be useful in the remediation of other synthetic dyes (used in food and textiles), as shown in Figure S8. After 75 min of contact, 100% of the colorant brilliant blue was adsorbed. Brilliant blue is a triarylmethane dye, denoted by E-number 133 (E133). It is approved for use in food, pharmaceutical, and cosmetic formulations. Regarding the azo

dyes, 100% of Red 40 (Allura red – E129) and 69.7% of tartrazine yellow (E102) were adsorbed into the biochar after 95 min of contact. It is unclear why, after 75 min, tartrazine yellow had a lower uptake than other dyes, but in a second test with 120 min of contact, it was possible to recover 100% of this colorant.

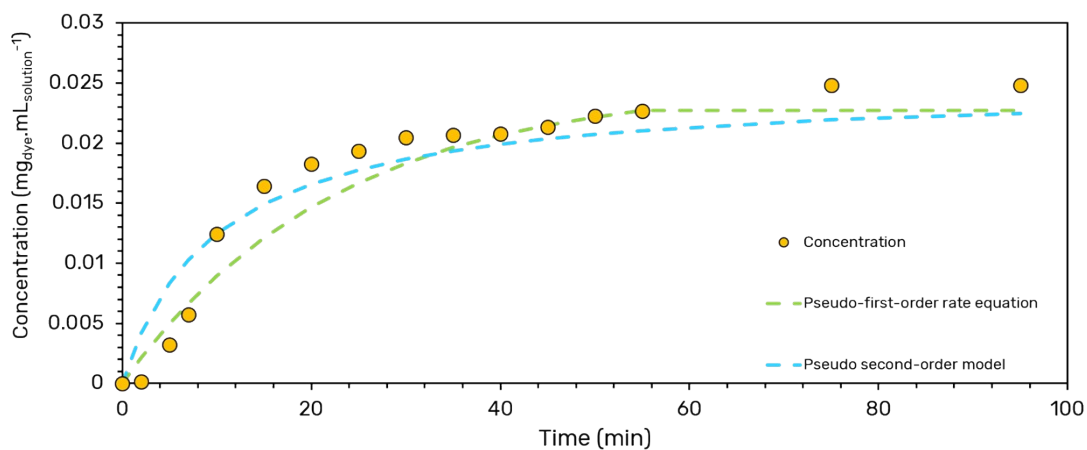

**Figure S6.** Pseudo first order and pseudo second order sorption kinetics of yellow sunset - food dye – using the biochar produced from the residual biomass obtained after the sequential extraction of anthocyanins and ellagic acid and derivatives.

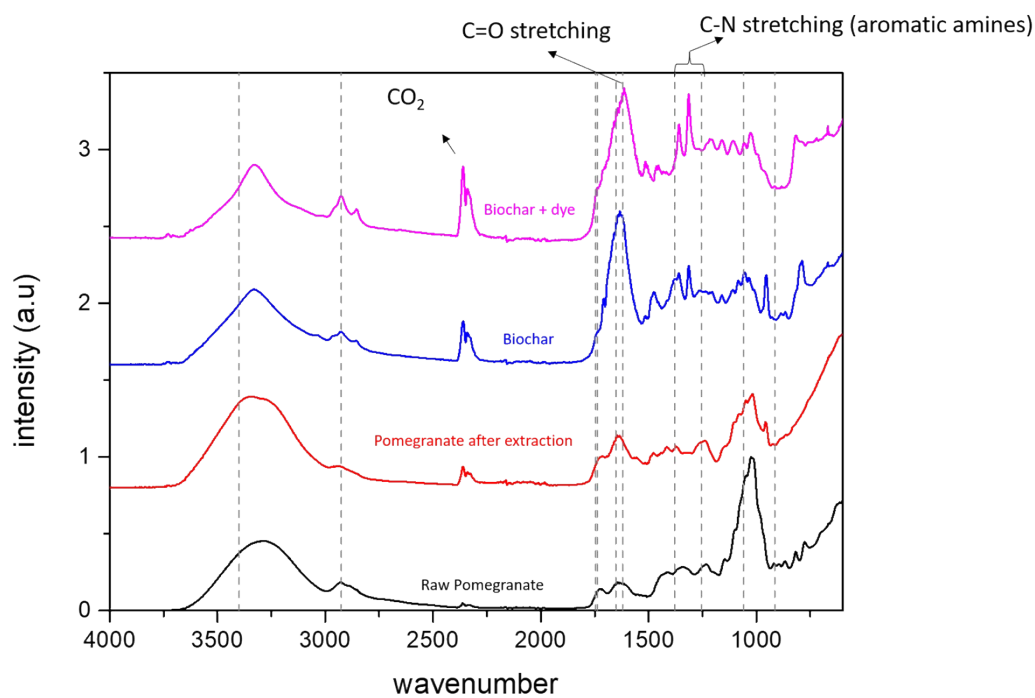

**Figure S7.** FTIR spectra of the raw pomegranate (before extraction) and post-extraction, biochar, and biochar after adsorption of sunset yellow dye.

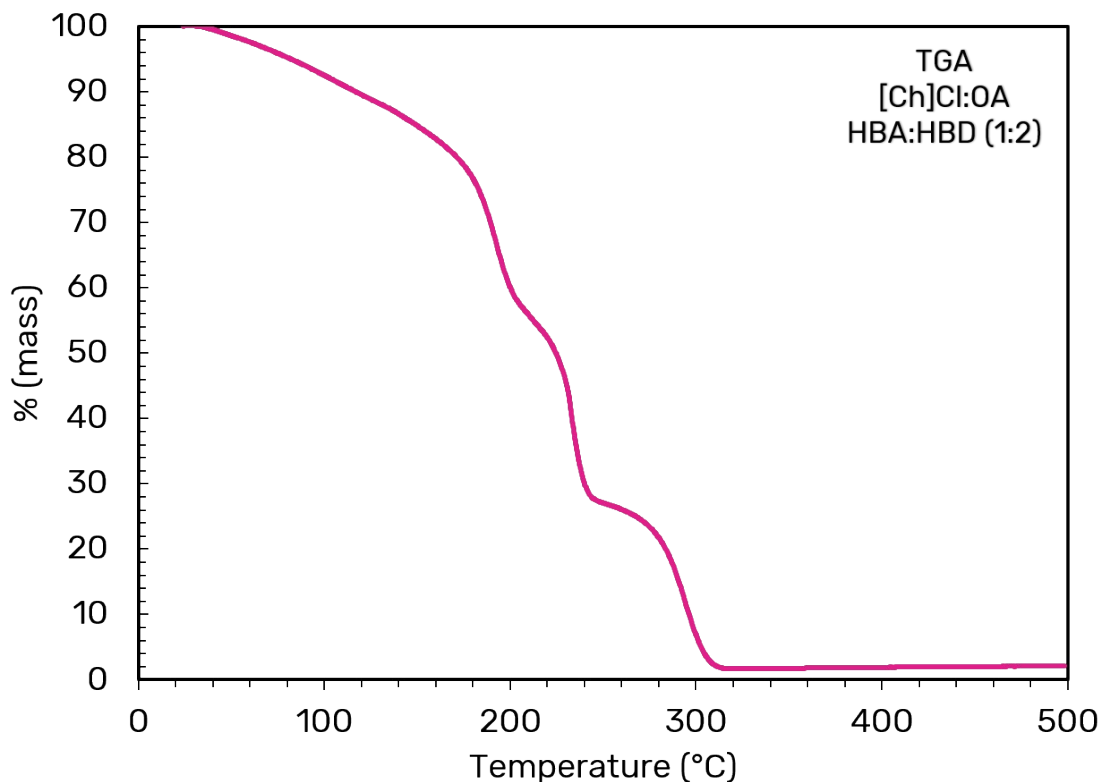

**Figure S8.** Thermogravimetric Analysis (TGA) of the eutectic solvent composed of cholinium chloride and oxalic acid ([Ch]Cl:OA, with a molar ratio of HBA:HBD (1:2), confirming its decomposition starting at temperatures exceeding 180°C.

Regarding the adsorption of textile dyes into the biochar material prepared with pomegranate wastes, by analysing Figure S9 it is possible to see adsorption values around 75-80% after 75 min of contact between the biochar and the aqueous dye solutions (indigo blue – 82.3%, chloranilic acid – 89.1%, and rhodamine – 78.3%). Another point that demonstrates the adsorption of synthetic dyes into biochar is the elemental composition of the samples after the remediation experiments. Table S10 shows the presence of sulfur elements, which are only detected after the adsorption of indigo blue and sunset yellow dyes. These dyes were specifically selected as evidence of the adsorption process. Even with lower efficiency in the adsorption of textile dyes than

food dyes, the biochar produced here is highly efficient. Thus, this carbon material may also be explored to produced filters or membranes, mixing more specific adsorbent materials that could assist the adsorption potential of the biochar, like ion exchange resins. Just to note that the production of this material was not optimize, which means that with the proper optimization of the material production, higher adsorption potential may be assessed.

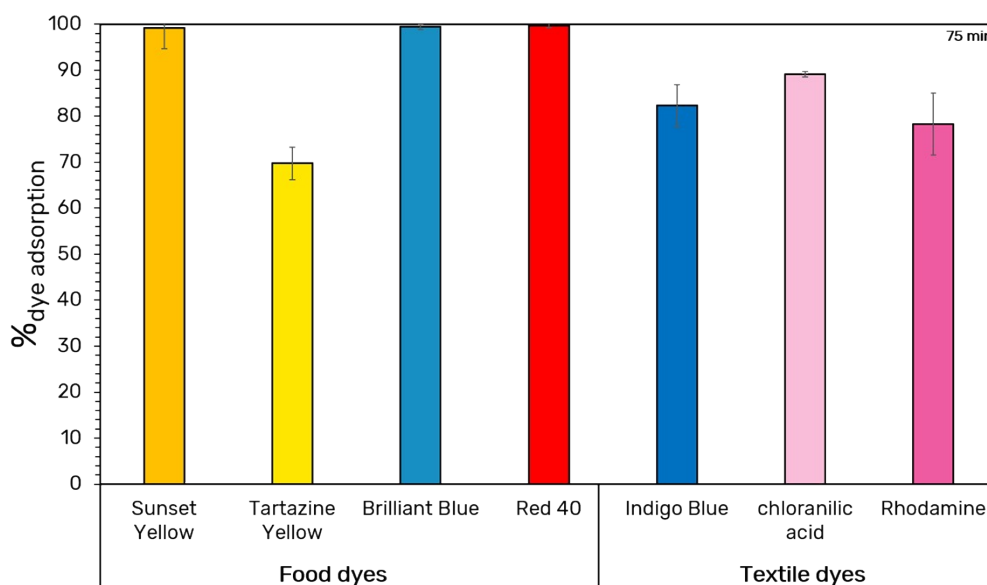

**Figure S9.** Evaluation of the dye adsorption (%) considering sunset yellow, tartazine yellow, brilliant blue, red 40, indigo blue, chloranilic acid, and rhodamine, into the biochar material developed through a eutectic solvent-mediated process from the residual biomass obtained after the sequential extraction of anthocyanins and ellagic acid and derivatives.



## References from ESI

- 1 P. D. Pathak, S. A. Mandavgane and B. D. Kulkarni, *Waste and Biomass Valorization*, 2017, **8**, 1127–1137.
- 2 K. Ko, Y. Dadmohammadi and A. Abbaspourrad, *Foods*, 2021, **10**, 657.
- 3 M. Abid, S. Cheikhrouhou, C. M. G. C. Renard, S. Bureau, G. Cuvelier, H. Attia and M. A. Ayadi, *Food Chem.*, 2017, **215**, 318–325.
- 4 A. Muhammad, K. S. Dayisoğlu, J. Pei, M. R. Khan, M. Salman, R. Ahmad, H. Ullah and G. R. Noor, *Front. Nutr.*, , DOI:10.3389/fnut.2023.1118156.
- 5 S. Khan, A. Patel and K. S. Bhise, *J. Drug Deliv. Ther.*, , DOI:10.22270/jddt.v7i2.1380.
- 6 S. El-Hamamsy and H. El-khamissi, *J. Agric. Chem. Biotechnol.*, 2020, **11**, 79–84.
- 7 S. K. Middha, T. Usha and V. Pande, *Evidence-Based Complement. Altern. Med.*, 2013, **2013**, 1–10.
